# Supplementary material for: Sheep Infection Trials with ‘Phase-Locked’ Vpma Expression Variants of Mycoplasma agalactiae—Towards Elucidating the Role of a Multigene Family Encoding Variable Surface Lipoproteins in Infection and Disease
Source: MDPI journal article supplement (doi:10.3390/microorganisms10040815), 2022-04-14
Supplement: s1 [file s1]

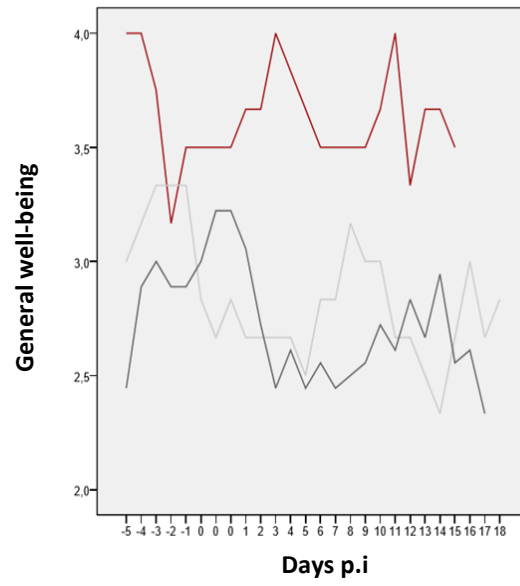

**Figure S1.** Average values of general well-being of the sheep based on Table 3. PG2 (light grey)- and PLM (black)-infected sheep groups are shown in comparison to the uninfected negative control (red) group. \*Individual PLM groups combined to form a single PLM group for analysis.

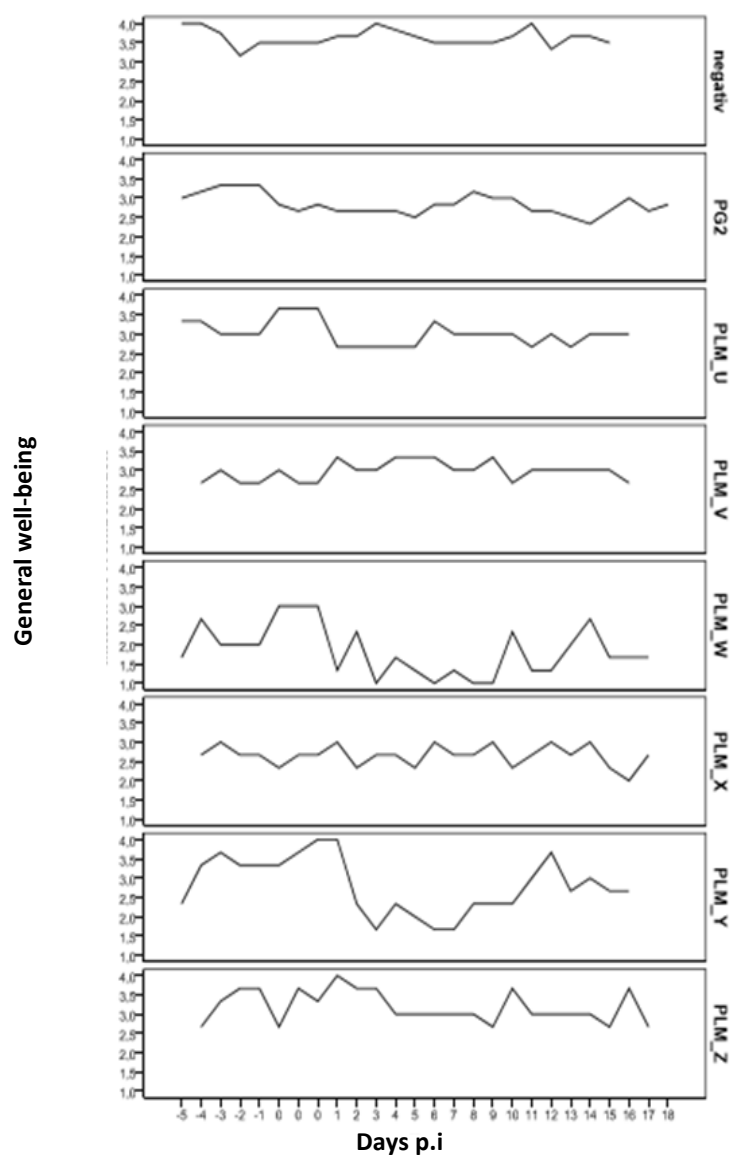

**Figure S2.** Average values of the general well-being of the eight infected groups of sheep over the test period based on Table 3.

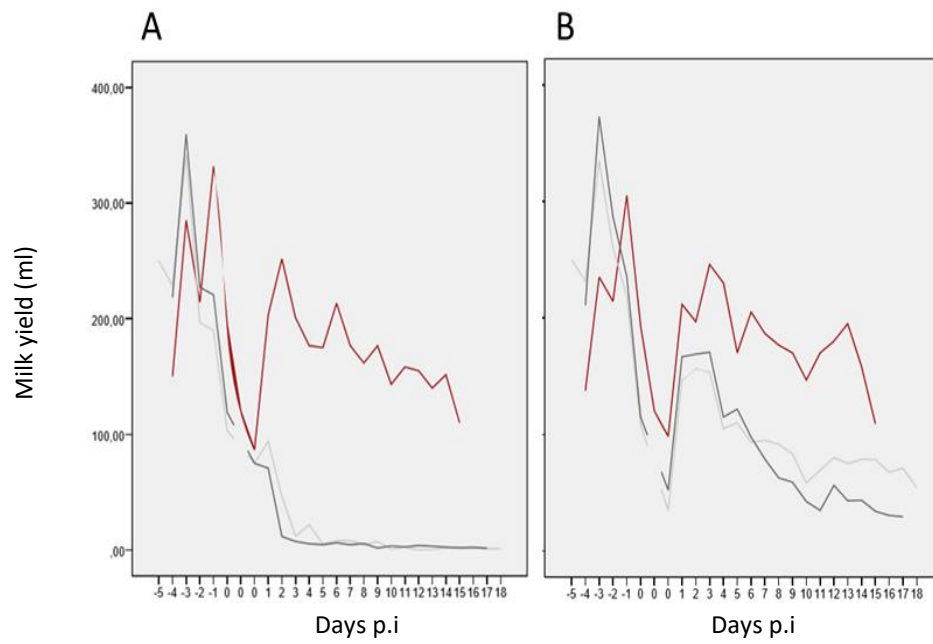

**Figure S3.** Average milk yield (in ml) of the right udder halves (A) and left udder halves (B) of the PG2 (light grey), and PLM (black)-infected sheep groups as compared to the uninfected negative control (red) group.\*Individual PLM groups combined to form a single PLM group for analysis

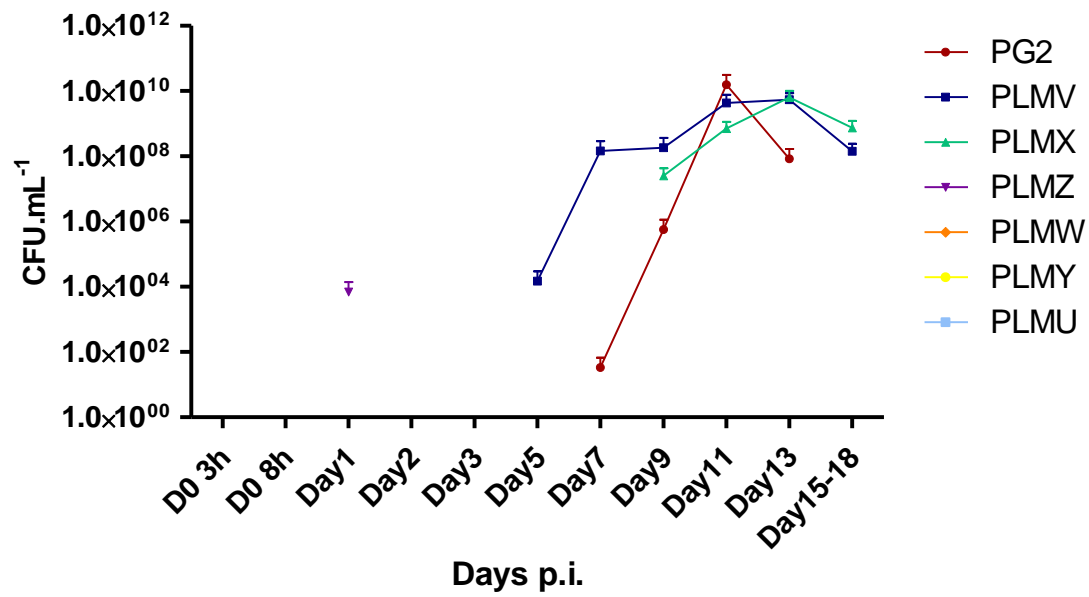

**Figure S4.** *M. agalactiae* load in milk samples obtained from the left udder halves of ewes experimentally infected with 10<sup>9</sup> cfu of six different Vpma PLMs (PLMV, PLMX, PLMZ, PLMW, PLMY and PLMU) and type strain PG2. Mean log<sub>10</sub> cfu values of mycoplasmas per milliliter of milk from three sheep in each group are plotted, and bars represent standard error of the mean.

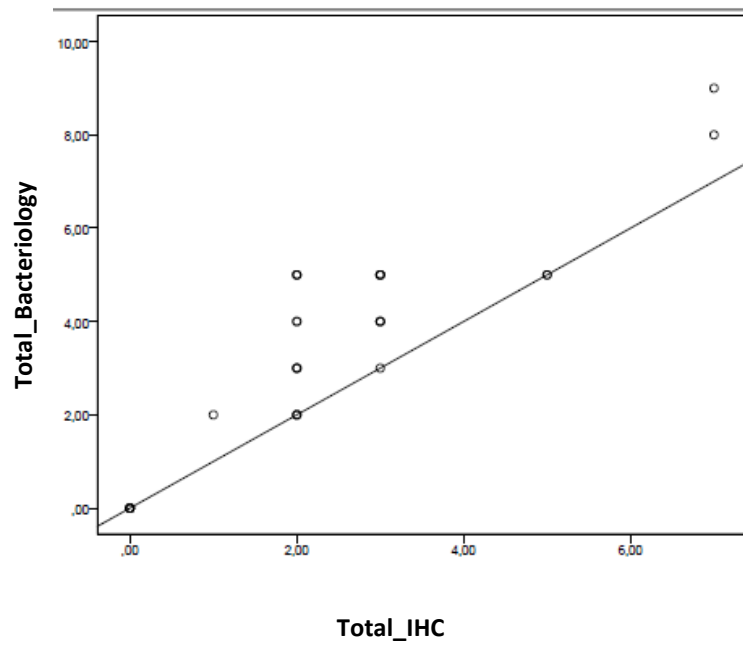

**Figure S5.** Correlation between the results of *M. agalactiae* bacteriological examination by culture method and by immunohistochemistry (IHC) using polyclonal rabbit antiserum against whole cell antigens of *M. agalactiae* type strain PG2.
