# Supplementary material for: Sheep Infection Trials with ‘Phase-Locked’ Vpma Expression Variants of Mycoplasma agalactiae—Towards Elucidating the Role of a Multigene Family Encoding Variable Surface Lipoproteins in Infection and Disease
Source: MDPI journal article supplement (doi:10.3390/microorganisms10040815), 2022-04-14
Supplement: s1 [file s1]

**Table S1.** Calculation of significant differences in the general well-being (significant differences in bold) of the experimental sheep. Significance was calculated using the Mann-Whitney test. An error probability of  $p < 0.05$  was assumed to be significant.

| Day         | Negative Control/<br>PG2T | Negative Control/<br>PLM | PG2T/<br>PLM |
|-------------|---------------------------|--------------------------|--------------|
| -5          | 0,121                     | <b>0,018</b>             | 0,465        |
| -4          | <b>0,014</b>              | <b>0,006</b>             | 0,334        |
| -3          | 0,221                     | 0,052                    | 0,353        |
| -2          | 0,863                     | 0,470                    | 0,189        |
| -1          | 0,476                     | 0,082                    | 0,189        |
| 0           | <b>0,043</b>              | <b>0,092</b>             | 0,380        |
| 0, 2 h p.i. | 0,116                     | 0,368                    | 0,210        |
| 0, 8 h p.i. | 0,080                     | 0,306                    | 0,163        |
| 1           | <b>0,014</b>              | 0,170                    | 0,200        |
| 2           | <b>0,014</b>              | <b>0,009</b>             | 0,821        |
| 3           | <b>0,007</b>              | <b>0,001</b>             | 0,725        |
| 4           | <b>0,006</b>              | <b>0,003</b>             | 0,826        |
| 5           | <b>0,011</b>              | <b>0,004</b>             | 0,912        |
| 6           | <b>0,043</b>              | <b>0,028</b>             | 0,664        |
| 7           | <b>0,043</b>              | <b>0,005</b>             | 0,280        |
| 8           | 0,241                     | <b>0,013</b>             | 0,094        |
| 9           | 0,194                     | <b>0,033</b>             | 0,369        |
| 10          | 0,075                     | <b>0,009</b>             | 0,430        |
| 11          | <b>0,007</b>              | <b>0,000</b>             | 0,822        |
| 12          | 0,056                     | 0,134                    | 0,360        |
| 13          | <b>0,011</b>              | <b>0,002</b>             | 0,475        |
| 14          | <b>0,007</b>              | <b>0,003</b>             | <b>0,009</b> |
| 15          | <b>0,030</b>              | <b>0,006</b>             | 0,872        |

**Table S2.** Course of the average internal body temperature (°C) over the test period; pathological values are written in bold

| Day          | Group            |             |             |             |             |             |             |             |
|--------------|------------------|-------------|-------------|-------------|-------------|-------------|-------------|-------------|
|              | Negative Control | PG2T        | PLM U       | PLM V       | PLM W       | PLM X       | PLM Y       | PLM Z       |
| -5           | 38,9             | <b>39,6</b> | nb          | nb          | 39,5        | nb          | nb          | nb          |
| -4           | 39,1             | <b>39,7</b> | 39,5        | <b>39,9</b> | 39,5        | <b>40,0</b> | 39,3        | 39,6        |
| -3           | 38,7             | 39,1        | 39,2        | 39,3        | 39,2        | 39,0        | 39,1        | 39,1        |
| -2           | 39,1             | 39,1        | 39,5        | 39,3        | 39,3        | 39,0        | 39,0        | 38,9        |
| -1           | 38,9             | 39,2        | 39,0        | 38,8        | 39,1        | 38,7        | 39,2        | 39,0        |
| 0            | 38,8             | 39,0        | 39,2        | 38,9        | 39,2        | 38,8        | 39,1        | 38,9        |
| 0, 2 h p.i.  | 38,7             | <b>39,6</b> | <b>39,9</b> | 39,1        | <b>39,6</b> | 38,9        | 39,5        | 39,1        |
| 0, 4 h p.i.  | 39,0             | 39,5        | <b>39,9</b> | <b>39,6</b> | <b>39,6</b> | 39,0        | <b>39,7</b> | <b>40,2</b> |
| 0, 8 h p.i.  | 38,9             | <b>39,6</b> | <b>39,8</b> | <b>39,8</b> | 39,5        | 38,8        | 39,4        | <b>39,9</b> |
| 0, 12 h p.i. | 38,9             | <b>39,6</b> | <b>39,8</b> | <b>39,8</b> | 39,5        | 38,8        | 39,1        | <b>39,7</b> |
| 1            | 38,9             | 38,9        | 39,2        | 38,9        | 38,7        | 38,8        | 39,1        | 38,8        |
| 2            | 38,6             | 39,4        | 38,8        | 39,1        | 39,1        | <b>40,0</b> | 39,1        | 38,8        |
| 3            | 38,8             | <b>39,7</b> | 39,0        | 39,0        | 39,1        | <b>39,8</b> | 39,5        | 39,4        |
| 4            | 38,6             | <b>39,6</b> | 39,3        | 39,2        | 39,1        | <b>39,9</b> | 39,3        | 39,4        |
| 5            | 38,6             | <b>39,6</b> | <b>40,0</b> | 39,3        | 39,3        | <b>39,6</b> | 39,5        | 39,4        |
| 6            | 38,8             | 39,3        | 39,3        | 39,3        | 39,4        | 39,0        | 39,2        | 38,9        |
| 7            | 38,7             | 39,2        | 39,3        | 39,2        | 39,1        | 38,8        | 38,8        | 38,9        |
| 8            | 38,6             | 39,1        | 39,0        | 39,1        | 39,2        | 38,7        | 38,9        | 38,8        |
| 9            | 38,6             | 39,2        | 39,0        | 38,6        | 39,1        | 38,6        | 38,9        | 39,0        |
| 10           | 38,8             | 39,2        | 39,1        | 39,1        | 39,4        | 38,9        | 38,8        | 38,9        |
| 11           | 38,7             | 39,1        | 38,6        | 39,1        | 39,0        | 39,3        | 38,7        | 38,7        |
| 12           | 38,6             | 38,7        | 38,8        | 39,1        | 39,0        | 38,6        | 38,8        | 38,7        |
| 13           | 38,6             | 38,9        | 38,9        | 38,9        | 39,4        | 38,7        | 38,8        | 38,9        |
| 14           | 38,7             | 38,9        | 38,9        | 38,7        | 39,0        | 38,7        | 39,0        | 38,8        |
| <b>15</b>    | 38,6             | 39,0        | 39,0        | 38,7        | 39,2        | 38,9        | 38,9        | 38,9        |
| 16           | nb               | 38,9        | 39,0        | 38,9        | 39,0        | 38,9        | 39,0        | 39,0        |

|    |    |      |    |    |      |      |    |      |
|----|----|------|----|----|------|------|----|------|
| 17 | nb | 38,8 | nb | nb | 39,2 | 39,0 | nb | 39,0 |
| 18 | nb | 39,0 | nb | nb | nb   | nb   | nb | nb   |

**Table S3.** Calculation of significant differences in the milk yield from the infected right udder halves between the groups (significant differences in bold). Significance was calculated using the post hoc test. An error probability of  $p < 0.05$  was assumed to be significant.

| Day | Milk Yield (Right Udder halves)       |                          |              |
|-----|---------------------------------------|--------------------------|--------------|
|     | Negative Control/<br>PG2 <sup>T</sup> | Negative Control/<br>PLM | PG2T/<br>PLM |
| -4  | 1,000                                 | 1,000                    | 1,000        |
| -3  | 1,000                                 | 1,000                    | 1,000        |
| -2  | 1,000                                 | 1,000                    | 1,000        |
| -1  | 0,402                                 | 0,448                    | 1,000        |
| 0   | 0,101                                 | 0,093                    | 1,000        |
| 1   | 0,181                                 | <b>0,021</b>             | 1,000        |
| 2   | <b>0,001</b>                          | <b>0,000</b>             | 1,000        |
| 3   | <b>0,002</b>                          | <b>0,000</b>             | 1,000        |
| 4   | <b>0,000</b>                          | <b>0,000</b>             | 1,000        |
| 5   | <b>0,001</b>                          | <b>0,000</b>             | 1,000        |
| 6   | <b>0,000</b>                          | <b>0,000</b>             | 1,000        |
| 7   | <b>0,010</b>                          | <b>0,001</b>             | 1,000        |
| 8   | <b>0,001</b>                          | <b>0,000</b>             | 1,000        |
| 9   | <b>0,000</b>                          | <b>0,000</b>             | 1,000        |
| 10  | <b>0,001</b>                          | <b>0,000</b>             | 1,000        |
| 11  | <b>0,007</b>                          | <b>0,001</b>             | 1,000        |
| 12  | <b>0,012</b>                          | <b>0,003</b>             | 1,000        |
| 13  | <b>0,010</b>                          | <b>0,002</b>             | 1,000        |
| 14  | <b>0,009</b>                          | <b>0,001</b>             | 1,000        |
| 15  | <b>0,003</b>                          | <b>0,000</b>             | 1,000        |

**Table S4.** Hyperplasia of the right (A) and left (B) udder lymph node.

**(A)**

| Group          |            | Frequency |      |   |
|----------------|------------|-----------|------|---|
| <b>Negativ</b> | Valid      | .00       | 6    |   |
|                | <b>PG2</b> | Valid     | 1.00 | 2 |
|                |            |           | 2.00 | 3 |
|                |            |           | 2.50 | 1 |
|                |            | Total     |      | 6 |
| <b>PLM_U</b>   | Valid      | 2.00      | 3    |   |
| <b>PLM_V</b>   | Valid      | 1.50      | 1    |   |
|                |            | 2.00      | 2    |   |
|                |            | Total     |      | 3 |
| <b>PLM_W</b>   | Valid      | 2.00      | 1    |   |
|                |            | 3.00      | 2    |   |
|                |            | Total     |      | 3 |
| <b>PLM_X</b>   | Valid      | 1.00      | 1    |   |
|                |            | 2.00      | 2    |   |
|                |            | Total     |      | 3 |
| <b>PLM_Y</b>   | Valid      | 2.00      | 2    |   |
|                |            | 3.00      | 1    |   |
|                |            | Total     |      | 3 |
| <b>PLM_Z</b>   | Valid      | .00       | 1    |   |
|                |            | 1.00      | 1    |   |
|                |            | 2.00      | 1    |   |
|                |            | Total     |      | 3 |

**(B)**

| Group   |       |       | Frequency |   |
|---------|-------|-------|-----------|---|
| Negativ | Valid | .00   | 6         |   |
|         | PG2   | Valid | .00       | 6 |
|         |       | Valid | .00       | 3 |
|         |       | Valid | 1.00      | 1 |
|         |       |       | 1.50      | 1 |
|         |       | 2.00  | 1         |   |
|         | Total |       | 3         |   |
| PLM_W   | Valid | .00   | 3         |   |
| PLM_X   | Valid | .00   | 1         |   |
|         |       |       | 2.00      | 2 |
|         |       | Total |           | 3 |
|         |       |       |           |   |
| PLM_Y   | Valid | .00   | 3         |   |
| PLM_Z   | Valid | .00   | 2         |   |
|         |       |       | 1.00      | 1 |
|         |       | Total |           | 3 |
|         |       |       |           |   |
